# Supplementary material
Source: Springer Nature journal article supplement (https://www.springermedizin.de/resource/supplementary/12985_2010_963_MOESM2_ESM.pdf/9608836)

A

$\mu\text{L}$       5      5/3      5/9      5/27      5/81      0

wt

108

112

141

B

Standard

ng

200

33

5.6

0.9

0.15

0.026

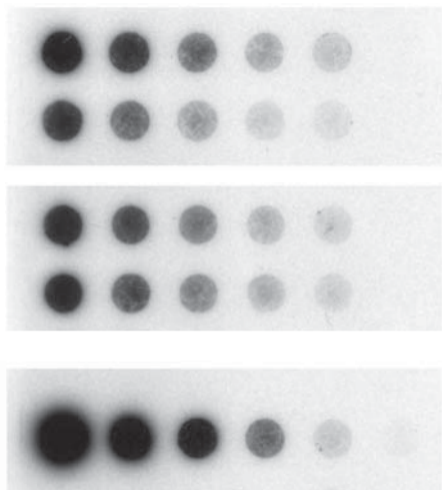

Supplement: MOESM2 [file 9608836]
